# Supplementary material for: Aggregation-induced chiroptical generation and photoinduced switching of achiral azobenzene-alt-fluorene copolymer endowed with left- and right-handed helical polysilanes
Source: Royal Society of Chemistry journal article supplement (doi:10.1039/c8ra09345h), 2019-01-01
Supplement: c8ra09345h1.pdf [file c8ra09345h1.pdf]

## Electronic Supporting information (ESI) for

### Aggregation-induced chiroptical generation and photoinduced switching of achiral azobenzene-alt-fluorene copolymer endowed with left- and right-handed helical polysilanes

Hailing Chen,<sup>a</sup> Lu Yin,<sup>a</sup> Meng Liu,<sup>a</sup> Laibing Wang,<sup>b</sup> Michiya Fujiki,<sup>b,\*</sup> Wei Zhang<sup>a,\*</sup> and Xiulin Zhu<sup>a,c</sup>

<sup>a</sup>Suzhou Key Laboratory of Macromolecular Design and Precision Synthesis, Jiangsu, Key Laboratory of Advanced Functional Polymer Design and Application, State and Local Joint Engineering Laboratory for Novel Functional Polymeric Materials, College of Chemistry, Chemical Engineering and Materials Science, Soochow University, Suzhou Industrial Park, Suzhou 215123, China. E-mail: weizhang@suda.edu.cn

<sup>b</sup>Division of Materials Science, Nara Institute of Science and Technology, 8916-5, Takayama, Ikoma, Nara 630-0192, Japan. E-mail: fujikim@ms.naist.jp.

<sup>c</sup>Global Institute of Software Technology, No 5. Qingshan Road, Suzhou National Hi-Tech District, Suzhou 215163, China

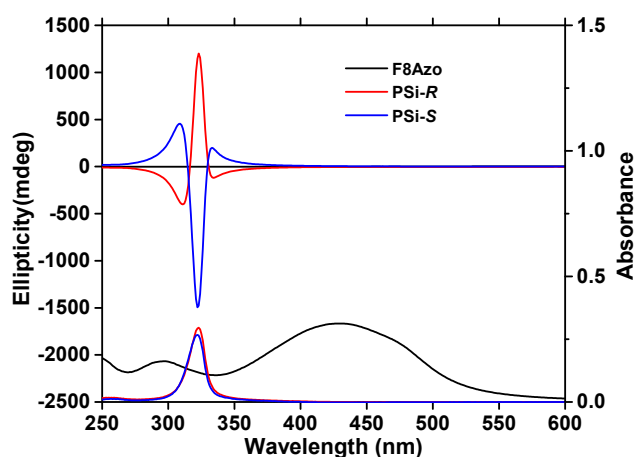

**Fig. S1.** CD and UV-vis spectra of PF8Azo and PSI-S/-R homo-aggregates in  $\text{CHCl}_3$ -MeOH cosolvent (2.0/1.0, (v/v)).  $[\text{PSI-S/-R}]_0 = [\text{PF8Azo}]_0 = 1.0 \times 10^{-5}$  M.

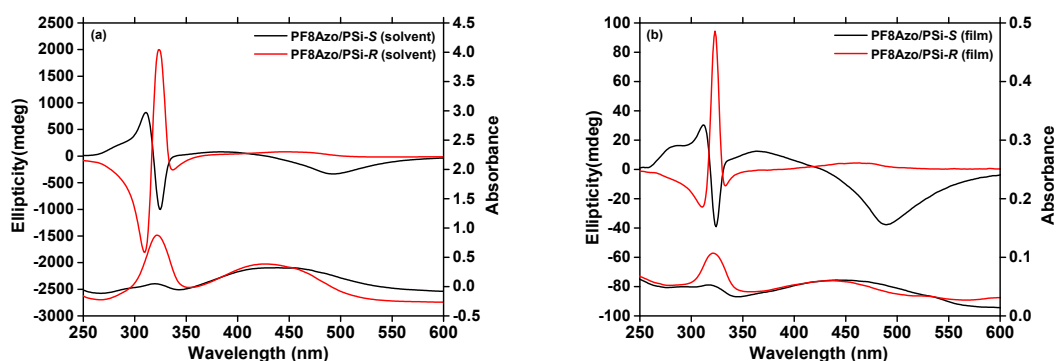

**Fig. S2.** (a) CD and UV-vis spectra of PF8Azo/PSI-S (black line) and PF8Azo/PSI-R (red line) hetero-aggregates in cosolvent and (b) CD and UV-vis spectra of the dried hetero-aggregate in grease onto quartz substrate. The aggregates are generated that  $[\text{PSI-S/-R}]_0 = [\text{PF8Azo}]_0 = 2.0 \times 10^{-5}$  M in chloroform-methanol (2.0/1.0, (v/v)) cosolvent.

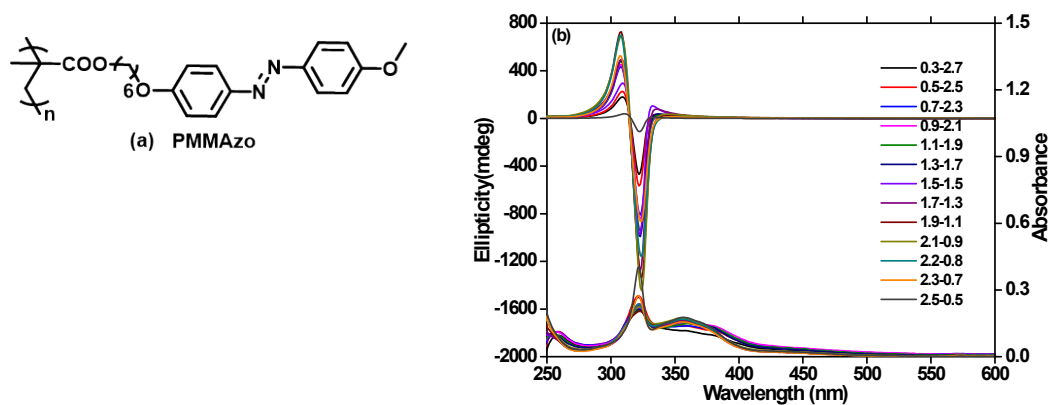

**Fig. S3.** (a) Chemical structure of PMMAzo ( $M_n = 14,400$  Da,  $M_w/M_n = 1.14$ ,  $DP_n = 36$ ); (b) Changes in CD and UV-vis spectra of hetero-aggregates of PMMAzo-PSi-5 that with different volume ratio of  $\text{CHCl}_3$ -MeOH. ( $[\text{PSi-S}]_0 = [\text{PMMAzo}]_0 = 1.0 \times 10^{-5}$  M).

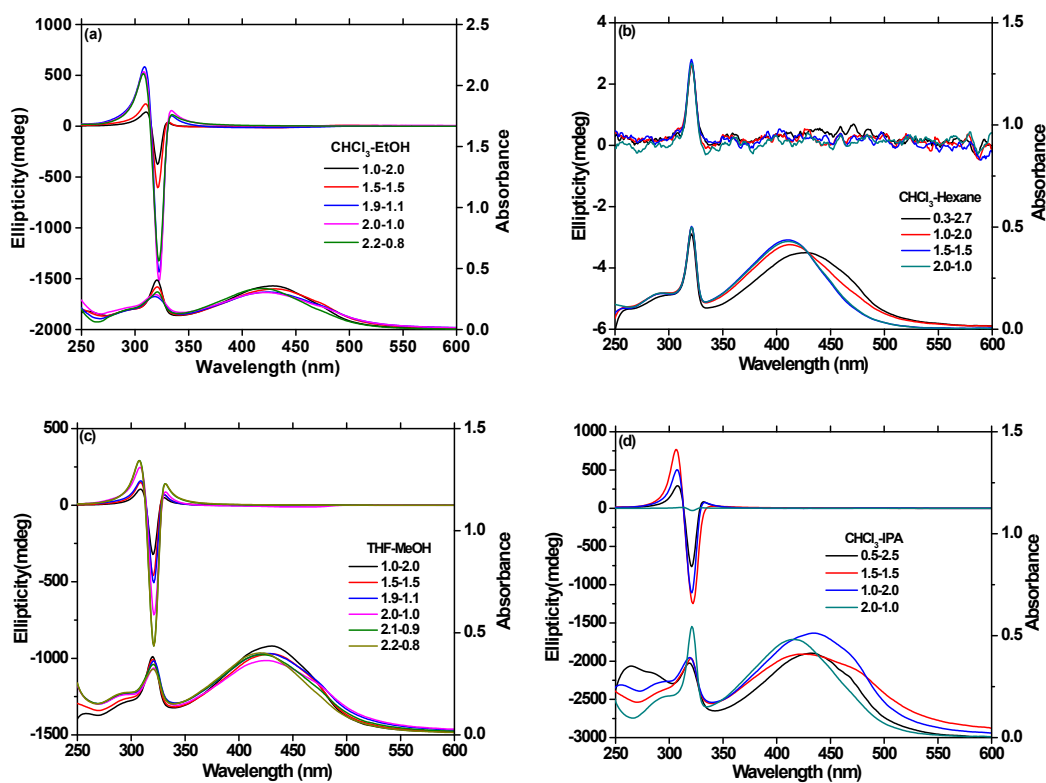

**Fig. S4.** CD and UV-vis spectra of hetero-aggregates including PSi-S and PF8Azo with a 1-to-1 molar ratio produced in different cosolvents with different volume ratio. [(a)chloroform-ethanol; (b)chloroform-hexane; (c)tetrahydrofuran-methanol; (d)chloroform-isopropanol. ] Their repeating units are  $[\text{PSi-S/-R}]_0 = [\text{PF8Azo}]_0 = 1.0 \times 10^{-5}$  M.

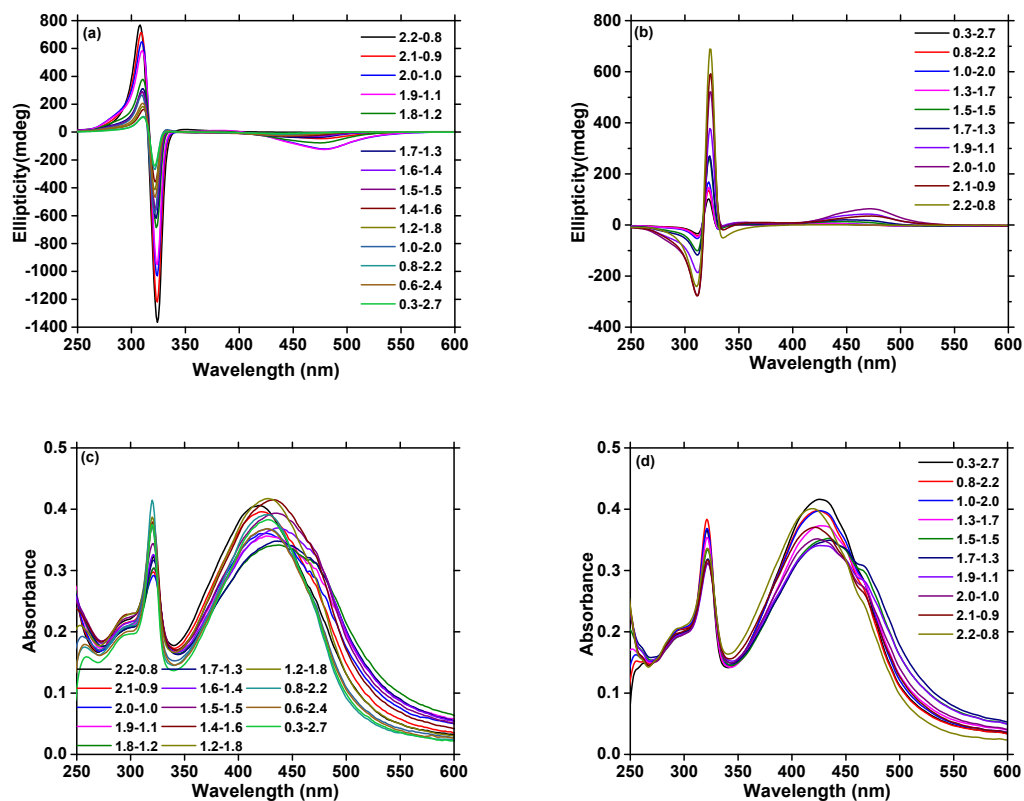

**Fig. S5.** Changes in CD spectra of hetero-aggregates of (a)PF8Azo/PSi-S and (b) PF8Azo/PSi-R that with different volume ratio of  $\text{CHCl}_3$ -MeOH. UV-vis spectra (c)and (d) show corresponding UV changes respectively. ( $[\text{PSi-S/-R}]_0 = [\text{PF8Azo}]_0 = 1.0 \times 10^{-5} \text{ M}$ ).

**Table S1.** Changes in particle size of PSi-S homo-aggregates with different volume ratio of  $\text{CHCl}_3$ -MeOH. ( $[\text{PSi-S}]_0 = 1.0 \times 10^{-5} \text{ M}$ ).

| $\text{CHCl}_3$ -MeOH | Eff.Diam.(nm) | PDI  |
|-----------------------|---------------|------|
| 0.3-2.7               | 678.3         | 0.21 |
| 0.5-2.5               | 617.8         | 0.18 |
| 0.8-2.2               | 562.7         | 0.18 |
| 1.0-2.0               | 535.3         | 0.20 |
| 1.3-1.7               | 509.2         | 0.13 |
| 1.5-1.5               | 492.0         | 0.19 |
| 1.7-1.3               | 473.4         | 0.10 |
| 1.9-1.1               | 474.3         | 0.16 |
| 2.0-1.0               | 484.2         | 0.12 |
| 2.1-0.9               | 386.4         | 0.14 |
| 2.2-0.8               | 319.6         | 0.09 |
| 2.3-0.7               | 310.8         | 0.09 |
| 2.4-0.6               | 184.7         | 0.13 |

**Table S2.** Changes in particle size of PF8Azo homo-aggregates with different volume ratio of CHCl<sub>3</sub>-MeOH. ([PF8Azo]<sub>0</sub> = 1.0×10<sup>-5</sup> M).

| CHCl <sub>3</sub> -MeOH | Eff. Diam.(nm) | PDI  |
|-------------------------|----------------|------|
| 0.3-2.7                 | 1776.8         | 0.39 |
| 0.5-2.5                 | 969.8          | 0.32 |
| 0.8-2.2                 | 794.7          | 0.26 |
| 1.0-2.0                 | 685.3          | 0.24 |
| 1.3-1.7                 | 629.4          | 0.19 |
| 1.5-1.5                 | 471.7          | 0.16 |
| 1.7-1.3                 | 314.4          | 0.07 |
| 1.9-1.1                 | 284.7          | 0.12 |
| 2.0-1.0                 | 263.8          | 0.08 |
| 2.1-0.9                 | 250.7          | 0.08 |
| 2.2-0.8                 | 318.7          | 0.14 |
| 2.3-0.7                 | 230.6          | 0.10 |
| 2.4-0.6                 | 225.2          | 0.12 |

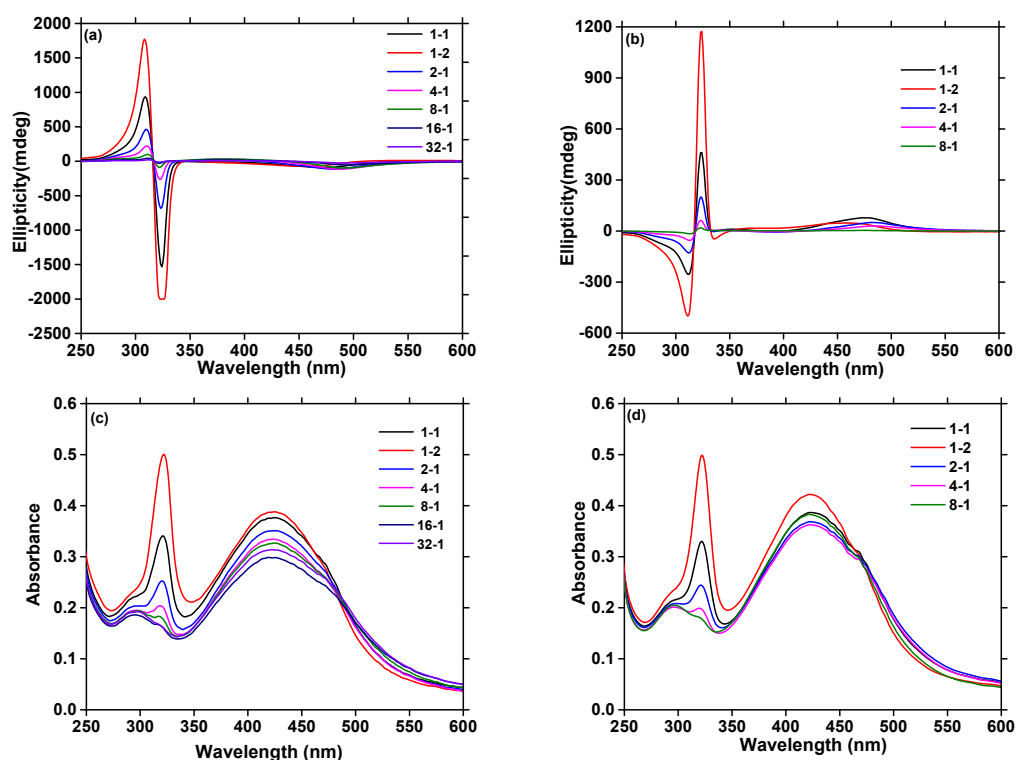

**Fig. S6.** Changes in CD spectra of hetero-aggregates of (a)PF8Azo/Psi-S and (b)PF8Azo/Psi-R that with different molar ratio of PF8Azo-to-Psi-S/-R ([PF8Azo]<sub>0</sub> = 1.0×10<sup>-5</sup> M). UV-vis spectra (c)and (d) show corresponding UV changes respectively. The volume ratio of CHCl<sub>3</sub>-MeOH = 2-1.

**Table S3.** Changes in  $g_{CD}$  values at 320 nm and 475 nm of the hetero-aggregates before and after the irradiation of 313-nm light. The hetero-aggregates were prepared under the condition that the volume ratio ( $\text{CHCl}_3$ -MeOH) was 2-to-1 and the molar ratio was 1-to-1 ( $[\text{PSi-S/-R}]_0 = [\text{PF8Azo}]_0 = 1.0 \times 10^{-5} \text{ M}$ ).

| Hetero-aggregate | $g_{CD}/10^{-3}$ | Before irradiation | 313 nm 5 s | 313 nm 10 s | 313 nm 15 s |
|------------------|------------------|--------------------|------------|-------------|-------------|
| PF8Azo/PSi-S     | at 320 nm        | -83.27             | 5.348      | 6.878       | 7.253       |
|                  | at 475 nm        | -12.34             | -21.73     | -21.14      | -20.40      |
| PF8Azo/PSi-R     | at 320 nm        | 23.61              | 9.706      | 4.613       | 0.6477      |
|                  | at 475 nm        | 6.492              | 9.184      | 8.625       | 8.071       |

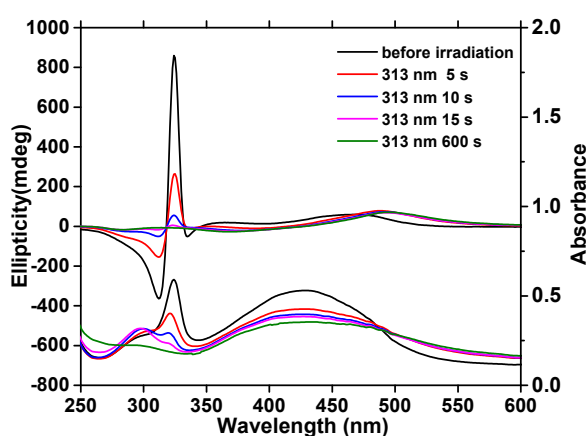

**Fig. S7.** Changes in CD and UV-vis spectra of PF8Azo/PSi-R hetero-aggregates before and after the irradiation of 313-nm light. The hetero-aggregates were prepared under the condition that the volume ratio ( $\text{CHCl}_3$ -MeOH) was 2-to-1 and the molar ratio was 1-to-1 ( $[\text{PSi-R}]_0 = [\text{PF8Azo}]_0 = 1.0 \times 10^{-5} \text{ M}$ ).

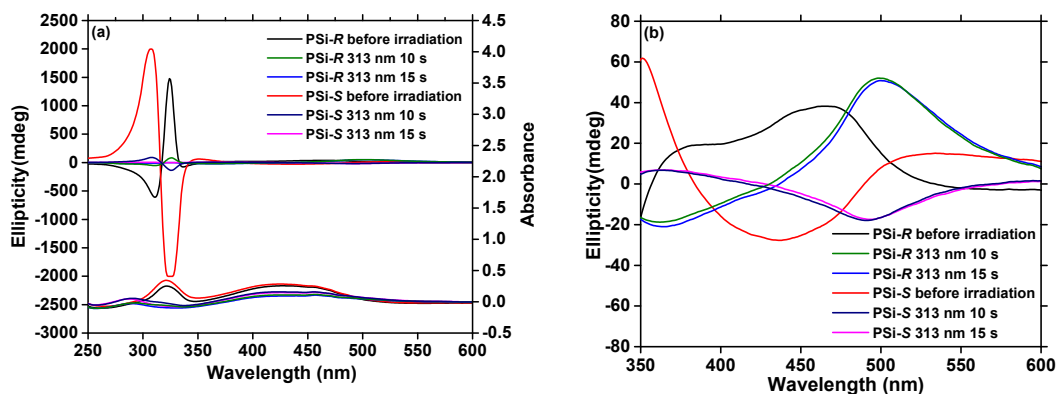

**Fig. S8.** (a) Changes in CD and UV-vis spectra of the PF8Azo/PSi-R and PF8Azo/PSi-S hetero-aggregates before and after the irradiation of 313-nm light. (b) is magnified part of (a). The hetero-aggregates were prepared under the condition that the volume ratio ( $\text{CHCl}_3$ -MeOH) was 2.1-to-0.9 and the molar ratio was 1-to-1 ( $[\text{PSi-S/-R}]_0 = [\text{PF8Azo}]_0 = 1.0 \times 10^{-5} \text{ M}$ ).

**Table S4.** Effective particle size of PSi-S homo-aggregates variation with time. ( $[\text{PSi-S}]_0 = 1.0 \times 10^{-5} \text{ M}$ ,  $\text{CHCl}_3\text{-MeOH} = 1\text{-}2$ )

| Time(min) | Eff. Diam.(nm) | PDI  |
|-----------|----------------|------|
| 1         | 421.1          | 0.16 |
| 2         | 467.3          | 0.14 |
| 3         | 524.6          | 0.14 |
| 4         | 535.3          | 0.20 |
| 5         | 597.6          | 0.19 |

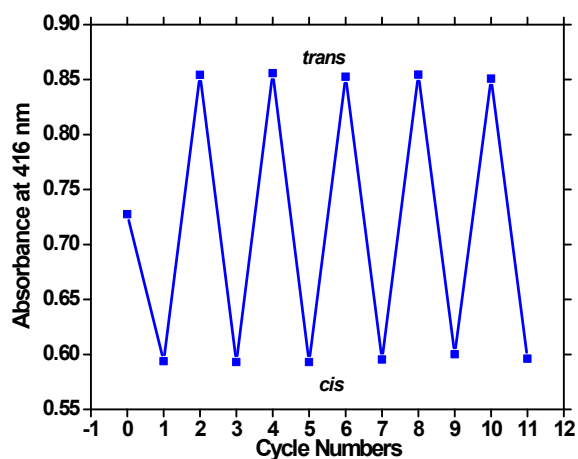

**Fig. S9.** Reversible photo-isomerization of non-aggregate PF8Azo dissolved in  $\text{CHCl}_3$  upon alternating irradiation with 405-nm and 546-nm light. Irradiation time:15 min,  $[\text{PF8Azo}]_0 = 1.0 \times 10^{-5} \text{ M}$ .

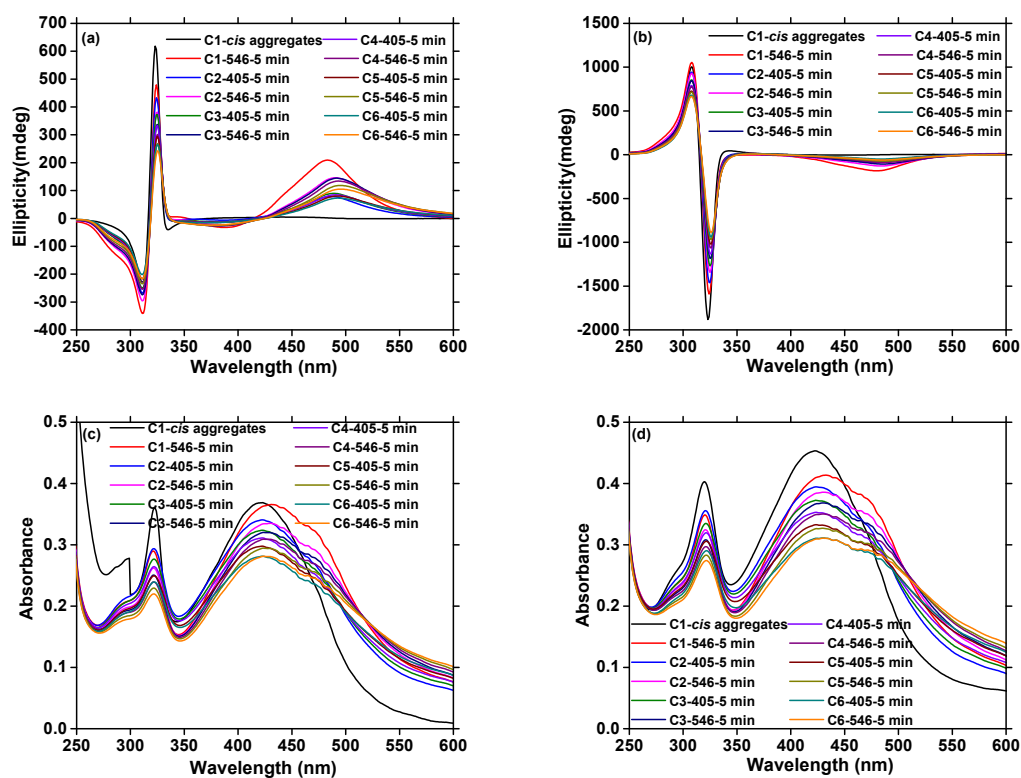

**Fig. S10.** Changes in CD spectra of hetero-aggregates of (a) PF8Azo/PSi-R and (b) PF8Azo/PSi-S upon alternating photoirradiation cycles with 405-nm and 546-nm light in  $\text{CHCl}_3\text{-MeOH}$  cosolvent (2.0/1.0, (v/v)). UV-vis spectra (c) and (d) show corresponding UV changes respectively. ( $[\text{PSi-S/R}]_0 = [\text{PF8Azo}]_0 = 1.0 \times 10^{-5} \text{ M}$ ). A  $\text{CHCl}_3$  solution of PF8Azo was irradiated for 15 min with 405-nm light, then aggregate with PSi-S/-R in  $\text{CHCl}_3\text{-MeOH}$  cosolvent to obtain the *cis* aggregates.

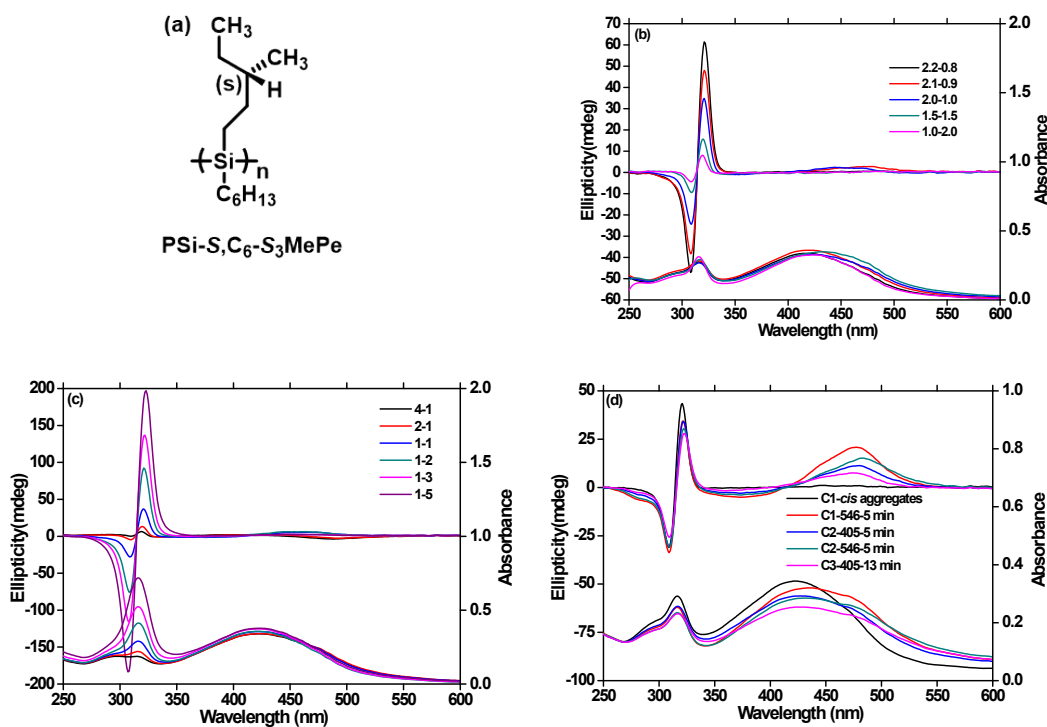

**Fig. S11.** (a) Chemical structure of  $C_6-S_3MePe$ . Changes in CD and UV-vis spectra of hetero-aggregates of (b) PF8Azo/ $C_6-S_3MePe$  that with different volume ratio of  $CHCl_3$ -MeOH ( $[C_6-S_3MePe]_0 = [PF8Azo]_0 = 1.0 \times 10^{-5}$  M), (c) PF8Azo/ $C_6-S_3MePe$  with different molar ratio of PF8Azo-to- $C_6-S_3MePe$  ( $[PF8Azo]_0 = 1.0 \times 10^{-5}$  M). (d) Changes in CD and UV-vis spectra of reversible photoisomerization of PF8Azo/ $C_6-S_3MePe$  hetero-aggregates upon alternating 405-nm and 546-nm light. The  $M_n$  values of  $C_6-S_3MePe$  and PF8Azo are 32,100 Da and 23,900 Da respectively.

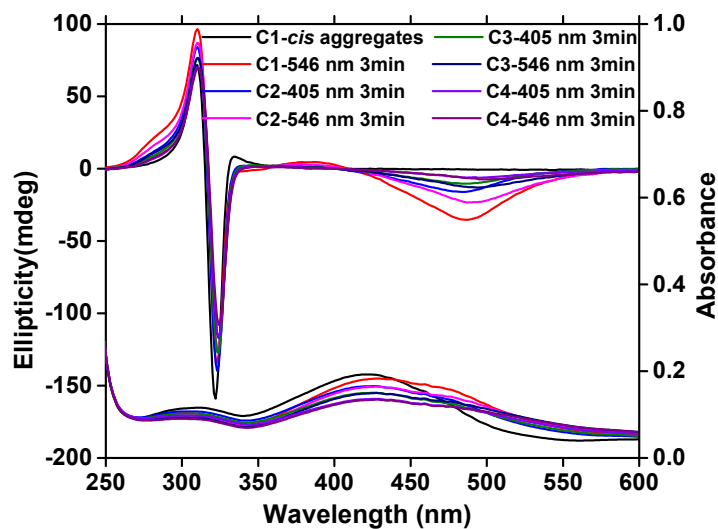

**Fig. S12.** Changes in CD and UV-vis spectra of PF8Azo-Psi-S hetero-aggregates upon alternating photoirradiation cycles with 405-nm and 546-nm light in  $CHCl_3$ -MeOH cosolvent (2.0/1.0, (v/v)). The molar ratio of PF8Azo-to-Psi-S is 4-to-1. ( $[PF8Azo]_0 = 0.5 \times 10^{-5}$  M). A  $CHCl_3$  solution of PF8Azo was irradiated for 15 min with 405-nm light, then aggregate with Psi-S in  $CHCl_3$ -MeOH cosolvent to obtain the *cis* aggregates.

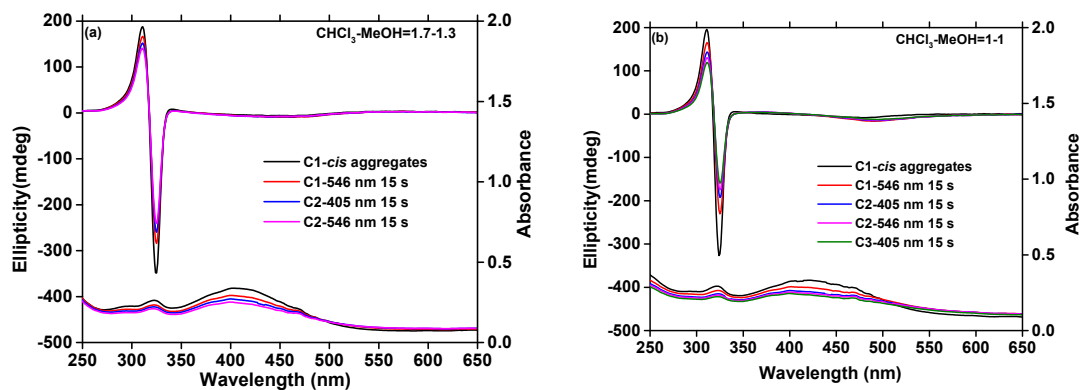

**Fig. S13.** Changes in CD and UV-vis spectra of PF8Azo/PSi-S hetero-aggregates upon alternating photoirradiation cycles with 405-nm and 546-nm light in  $\text{CHCl}_3$ -MeOH cosolvent [(a)1.7/1.3, (v/v) ; (b)1/1, (v/v)]. The molar ratio of PF8Azo-to-PSi-S is 1-to-1.  $[\text{PF8Azo}]_0 = 1.0 \times 10^{-5} \text{ M}$ ,  $M_n(\text{PF8Azo}) = 7,300 \text{ Da}$ . A  $\text{CHCl}_3$  solution of PF8Azo was irradiated for 15 min with 405-nm light, then aggregate with PSi-S in  $\text{CHCl}_3$ -MeOH cosolvent to obtain the *cis* aggregates.

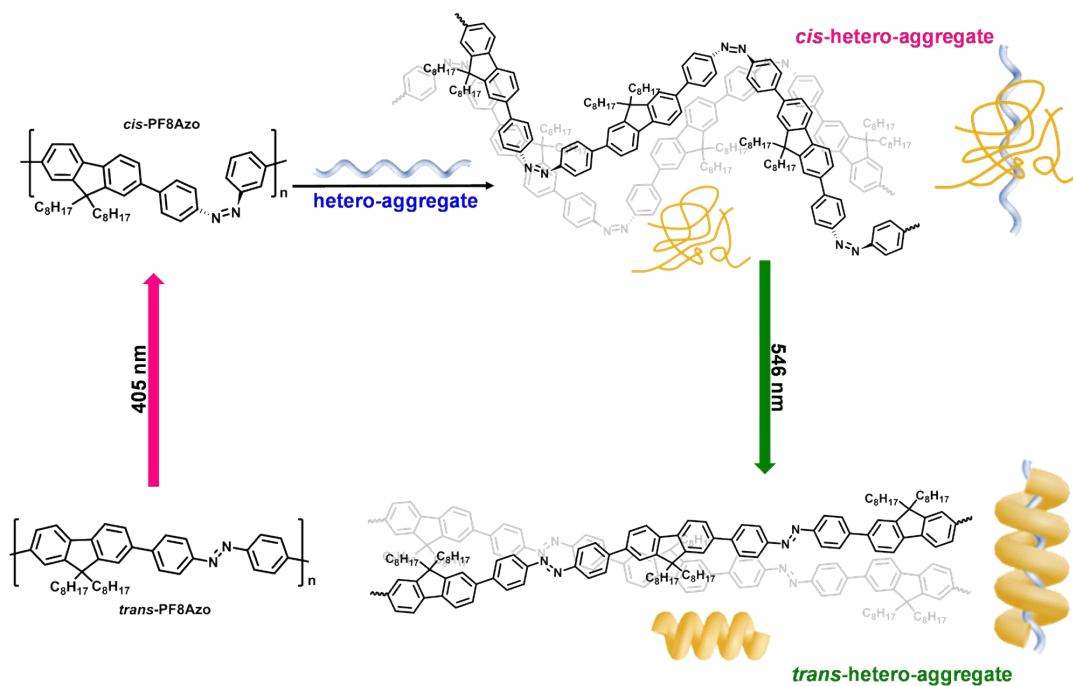

**Scheme S1.** Proposed mechanism for the enhancement of  $g_{\text{CD}}$  upon 1st photoirradiation at 546 nm.

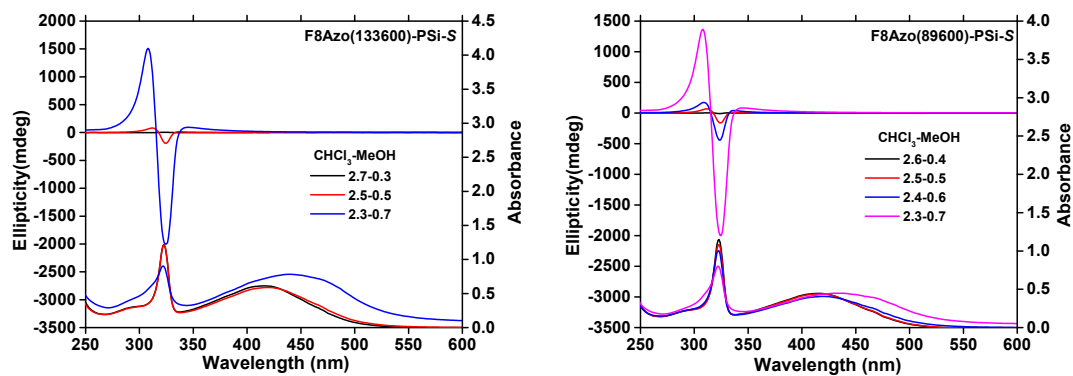



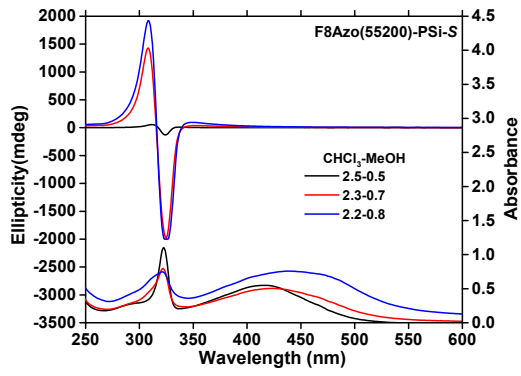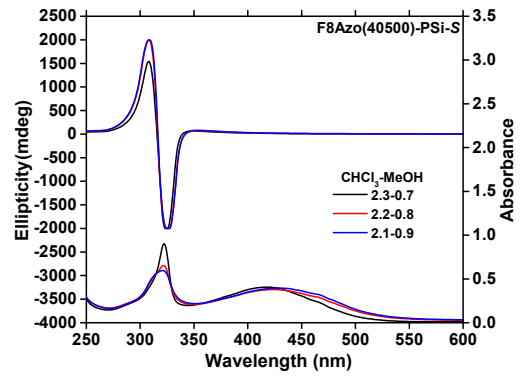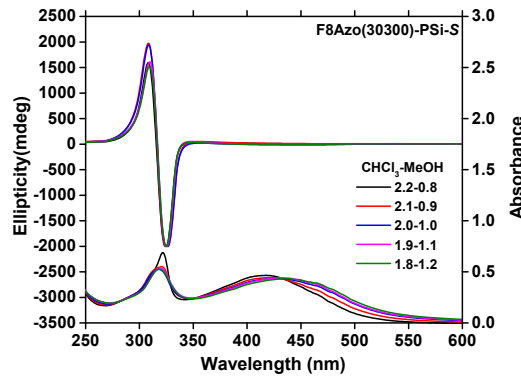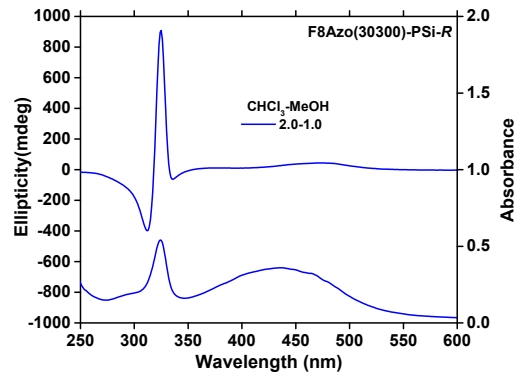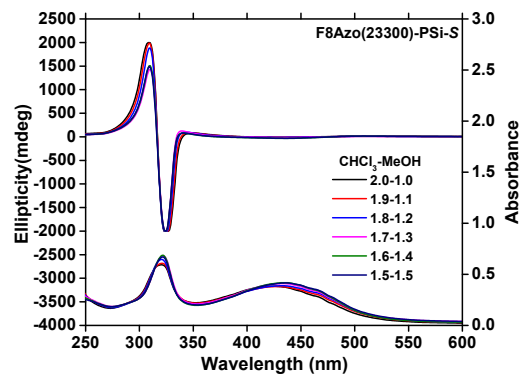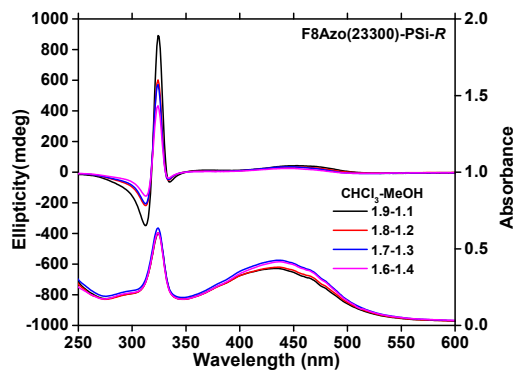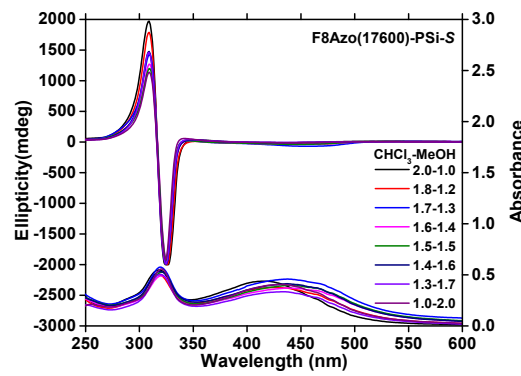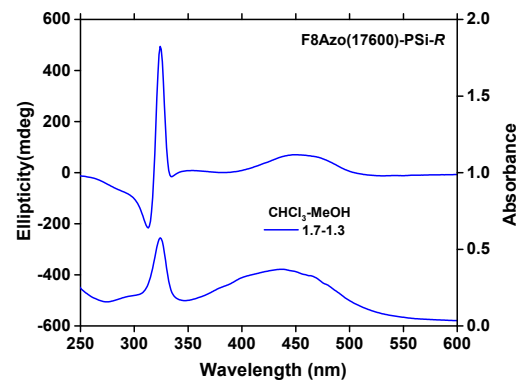

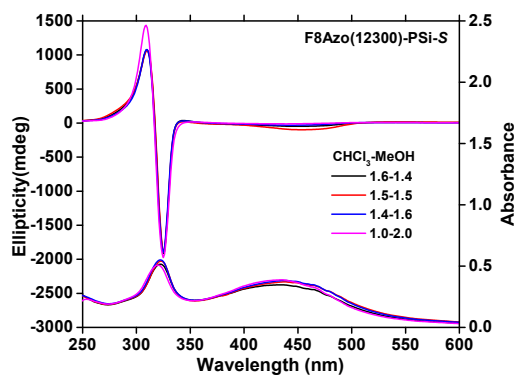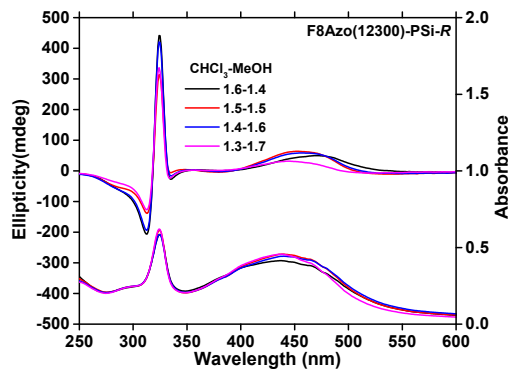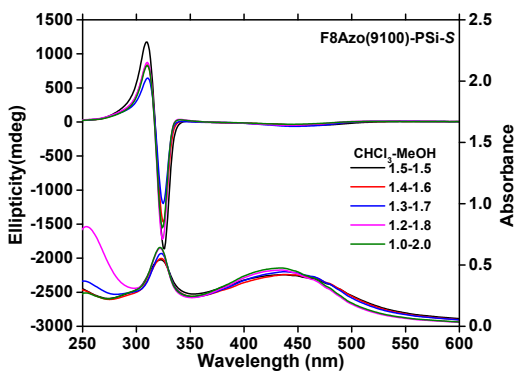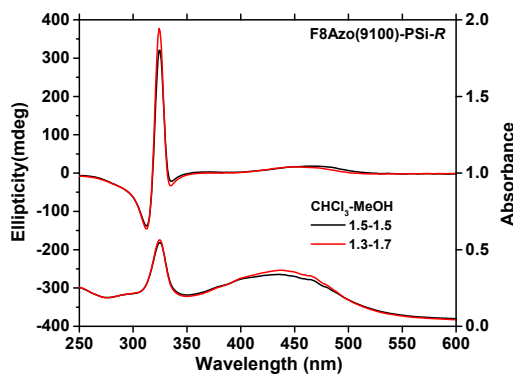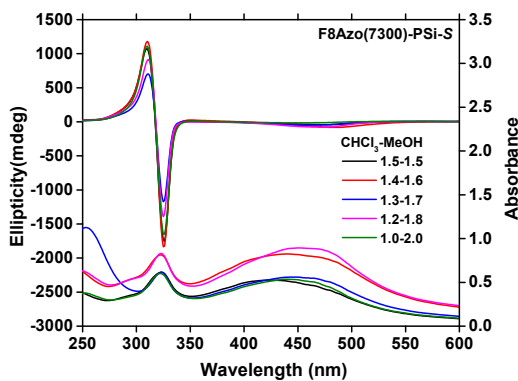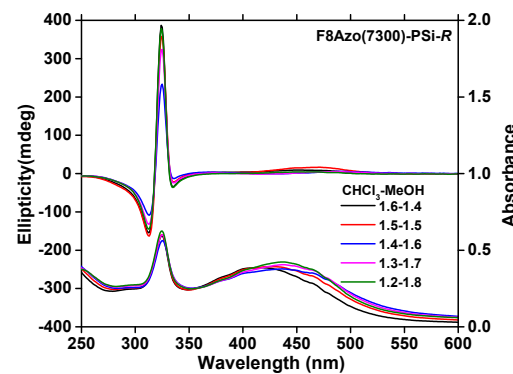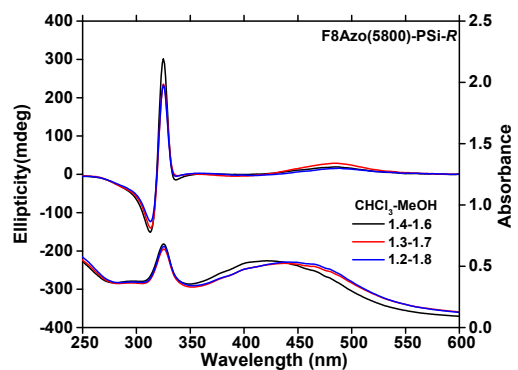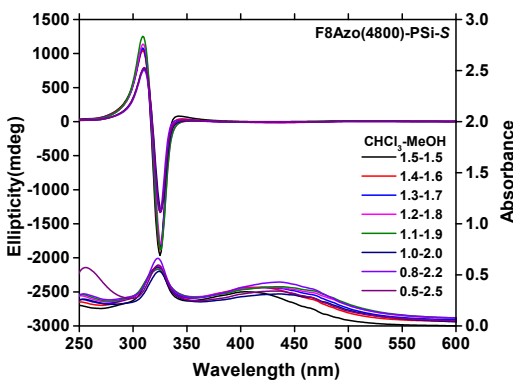

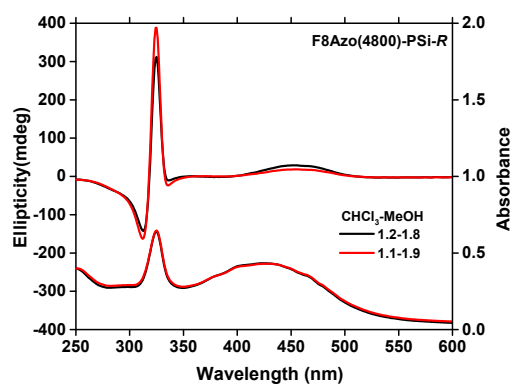

**Fig. S14.** Changes in CD and UV-vis spectra of PSi-S/-R hetero-aggregates with PF8Azo which has different  $M_{n,GPC}$ . The hetero-aggregates were prepared under the condition that the molar ratio was 1-to-1 ( $[PSi-S/-R]_0 = [PF8Azo]_0 = 1.0 \times 10^{-5}$  M) in  $CHCl_3$ -MeOH cosolvent that with different volume ratio.

**Table S5.** Molecular weight characteristics and number-average degree of polymerization of PF8Azo that applied for exploring molecular weight effects.

| Fraction | $M_{n,GPC}$ (g/mol) | $M_w/M_n$ | $DP_n$ |
|----------|---------------------|-----------|--------|
| 1        | 133,600             | 1.53      | 234    |
| 2        | 89,600              | 1.63      | 157    |
| 3        | 55,200              | 1.69      | 97     |
| 4        | 40,500              | 1.27      | 71     |
| 5        | 30,300              | 1.68      | 53     |
| 6        | 23,300              | 1.18      | 41     |
| 7        | 17,600              | 1.42      | 31     |
| 8        | 12,300              | 1.17      | 22     |
| 9        | 9,100               | 1.06      | 16     |
| 10       | 7,300               | 1.03      | 13     |
| 11       | 5,800               | 1.05      | 10     |
| 12       | 4,800               | 1.02      | 8      |
